# Supplementary material
Source: PubMed Central journal article supplement (PMC2873052)
Supplement: NIHMS73801-supplement-1.pdf [file NIHMS73801-supplement-1.pdf]

**Supplementary Table 1.** Standardized betas (SE) and p-values in models predicting time to walk (sec) for the total cohort n=795.

| Standardized betas (SE) and p-values |                 |                 |                 |                 |                 |
|--------------------------------------|-----------------|-----------------|-----------------|-----------------|-----------------|
|                                      | Model 1         | Model 2         | Model 3         | Model 4         | Model 5         |
| <b>PhMTR</b>                         | - 0.22 (0.007)  | - 0.21 (0.007)  | - 0.14 (0.008)  | - 0.21 (0.007)  | - 0.13 (0.008)  |
|                                      | <i>p</i> <0.001 | <i>p</i> <0.001 | <i>p</i> =0.001 | <i>p</i> <0.001 | <i>p</i> =0.004 |
| <b>WMH volume<sup>1</sup></b>        |                 | 0.12 (0.014)    |                 |                 | 0.11 (0.014)    |
|                                      |                 | <i>p</i> <0.001 | -               |                 | <i>p</i> <0.001 |
| <b>Brain atrophy</b>                 |                 |                 | 0.15 (1.818)    |                 | 0.15 (1.803)    |
|                                      |                 |                 | <i>p</i> =0.001 |                 | <i>p</i> =0.001 |
| <b>Brain infarcts</b>                | -               |                 | -               | 0.06 (0.121)    | 0.04 (0.121)    |
|                                      |                 |                 |                 | <i>p</i> =0.05  | <i>p</i> =0.20  |

**Supplementary Table 2.** Standardized betas (SE) and p-values in models predicting time to walk (sec) for the total cohort n=795.

| Standardized betas (SE) and p-values |                               |                                                                        |                               |                             |                  |                 |
|--------------------------------------|-------------------------------|------------------------------------------------------------------------|-------------------------------|-----------------------------|------------------|-----------------|
|                                      | Model 1                       | Model 2                                                                | Model 3                       | Model 4                     | Model 5          | Model 6         |
|                                      | (adjusted for age and gender) | (Model 1 further adjusted for health-related conditions <sup>^</sup> ) | (Model 1 + Physical activity) | (Model 1 + Muscle strength) | (Model 1 + DSST) | (Model 1 + GDS) |
| <b>Peak height-MTI</b>               | - 0.13 (0.008)                | - 0.11 (0.008)                                                         | - 0.10 (0.008)                | - 0.12 (0.008)              | - 0.09 (0.008)   | - 0.11 (0.008)  |
|                                      | <i>p</i> =0.002               | <i>p</i> =0.01                                                         | <i>p</i> =0.02                | <i>p</i> =0.003             | <i>p</i> =0.03   | <i>P</i> =0.01  |
| <b>WMH volume</b>                    | 0.12 (0.014)                  | 0.12 (0.014)                                                           | 0.11 (0.014)                  | 0.10 (0.014)                | 0.10 (0.014)     | 0.10 (0.014)    |
|                                      | <i>p</i> <0.001               | <i>p</i> <0.001                                                        | <i>p</i> =0.001               | <i>p</i> =0.002             | <i>p</i> =0.001  | <i>P</i> =0.002 |
| <b>Brain atrophy</b>                 | 0.15 (1.803)                  | 0.16 (1.808)                                                           | 0.16 (1.801)                  | 0.11 (1.770)                | 0.15 (1.777)     | 0.14 (1.778)    |
|                                      | <i>p</i> =0.001               | <i>p</i> =0.001                                                        | <i>p</i> =0.001               | <i>p</i> =0.01              | <i>p</i> =0.001  | <i>P</i> =0.002 |

<sup>^</sup> Includes hip/knee osteoarthritis, diabetes or IFG, coronary artery calcium and body mass index.
